# Supplementary material
Source: publisher figshare collection journal article supplement (https://acs.figshare.com/ndownloader/files/5758611)

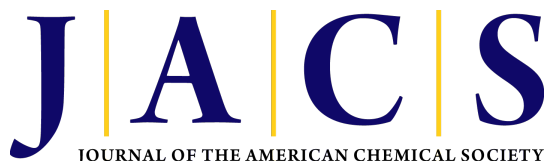

JOURNAL OF THE AMERICAN CHEMICAL SOCIETY

J. Am. Chem. Soc., 1998, 120(11), 2682-2683, DOI:[10.1021/ja974321v](https://doi.org/10.1021/ja974321v)

#### Terms & Conditions

Electronic Supporting Information files are available without a subscription to ACS Web Editions. The American Chemical Society holds a copyright ownership interest in any copyrightable Supporting Information. Files available from the ACS website may be downloaded for personal use only. Users are not otherwise permitted to reproduce, republish, redistribute, or sell any Supporting Information from the ACS website, either in whole or in part, in either machine-readable form or any other form without permission from the American Chemical Society. For permission to reproduce, republish and redistribute this material, requesters must process their own requests via the RightsLink permission system. Information about how to use the RightsLink permission system can be found at <http://pubs.acs.org/page/copyright/permissions.html>

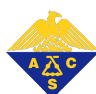

ACS Publications

MOST TRUSTED. MOST CITED. MOST READ.

Copyright © 1998 American Chemical Society

eg99a #1/1 YC-17 CDCl3 400MHz 8/18/97

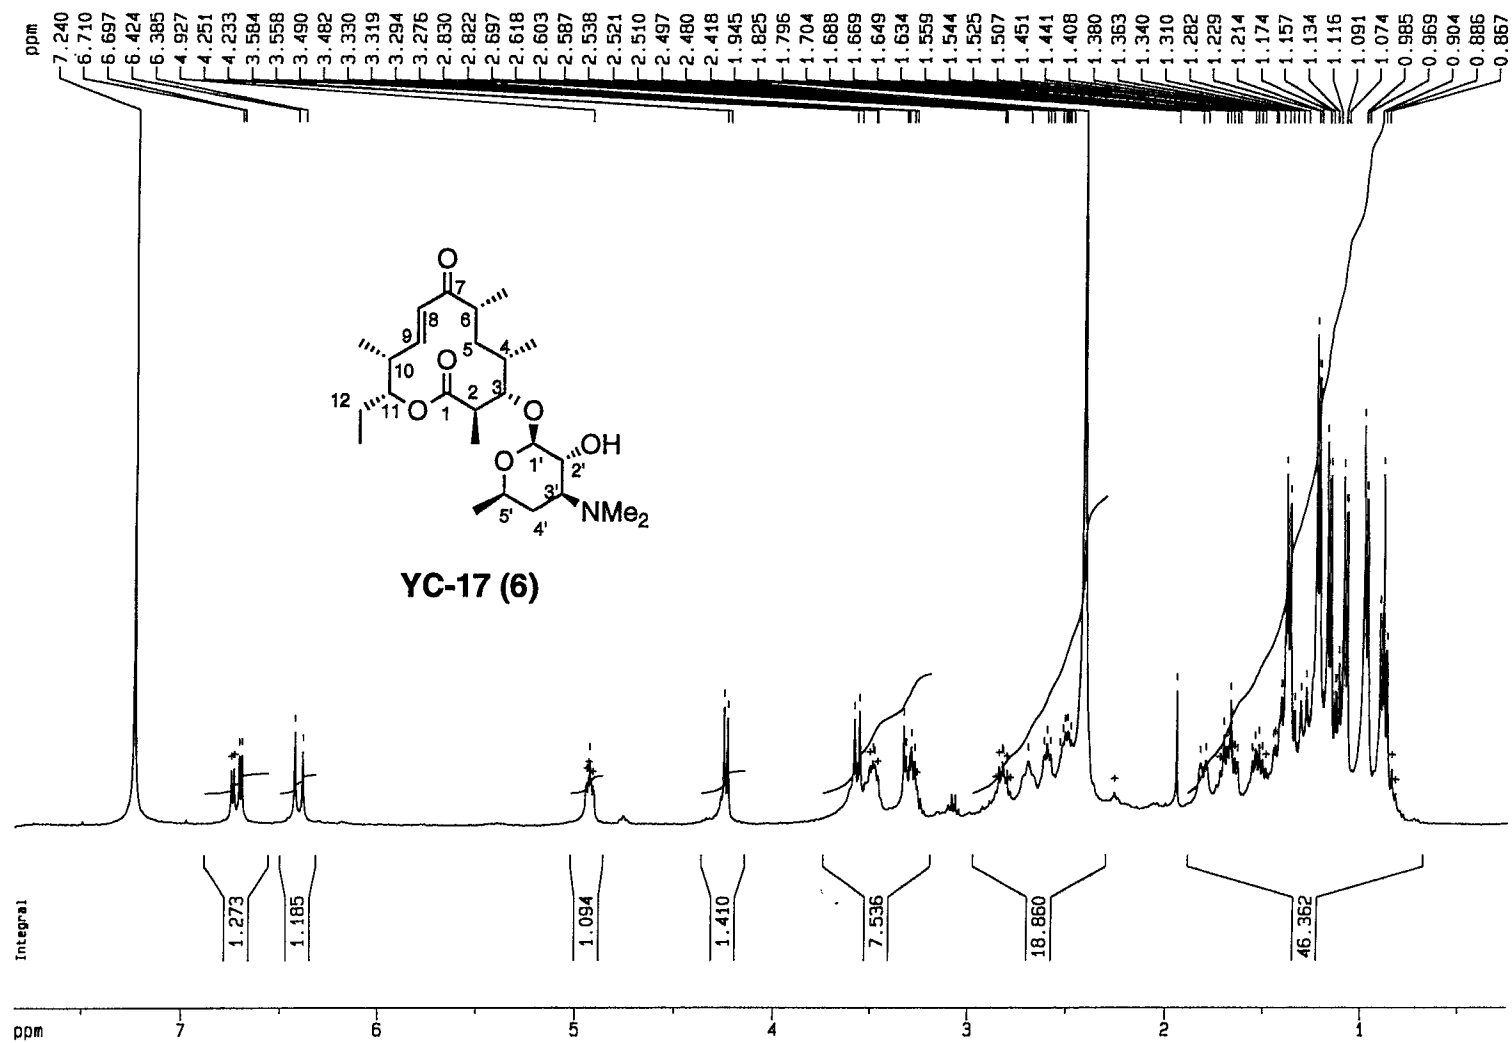

I. <sup>1</sup>H NMR spectrum of YC-17 (6) [400 MHz, CDCl<sub>3</sub>]

II.  $^{13}\text{C}$  NMR spectrum of YC-17 (6) [100 MHz,  $\text{CDCl}_3$ ]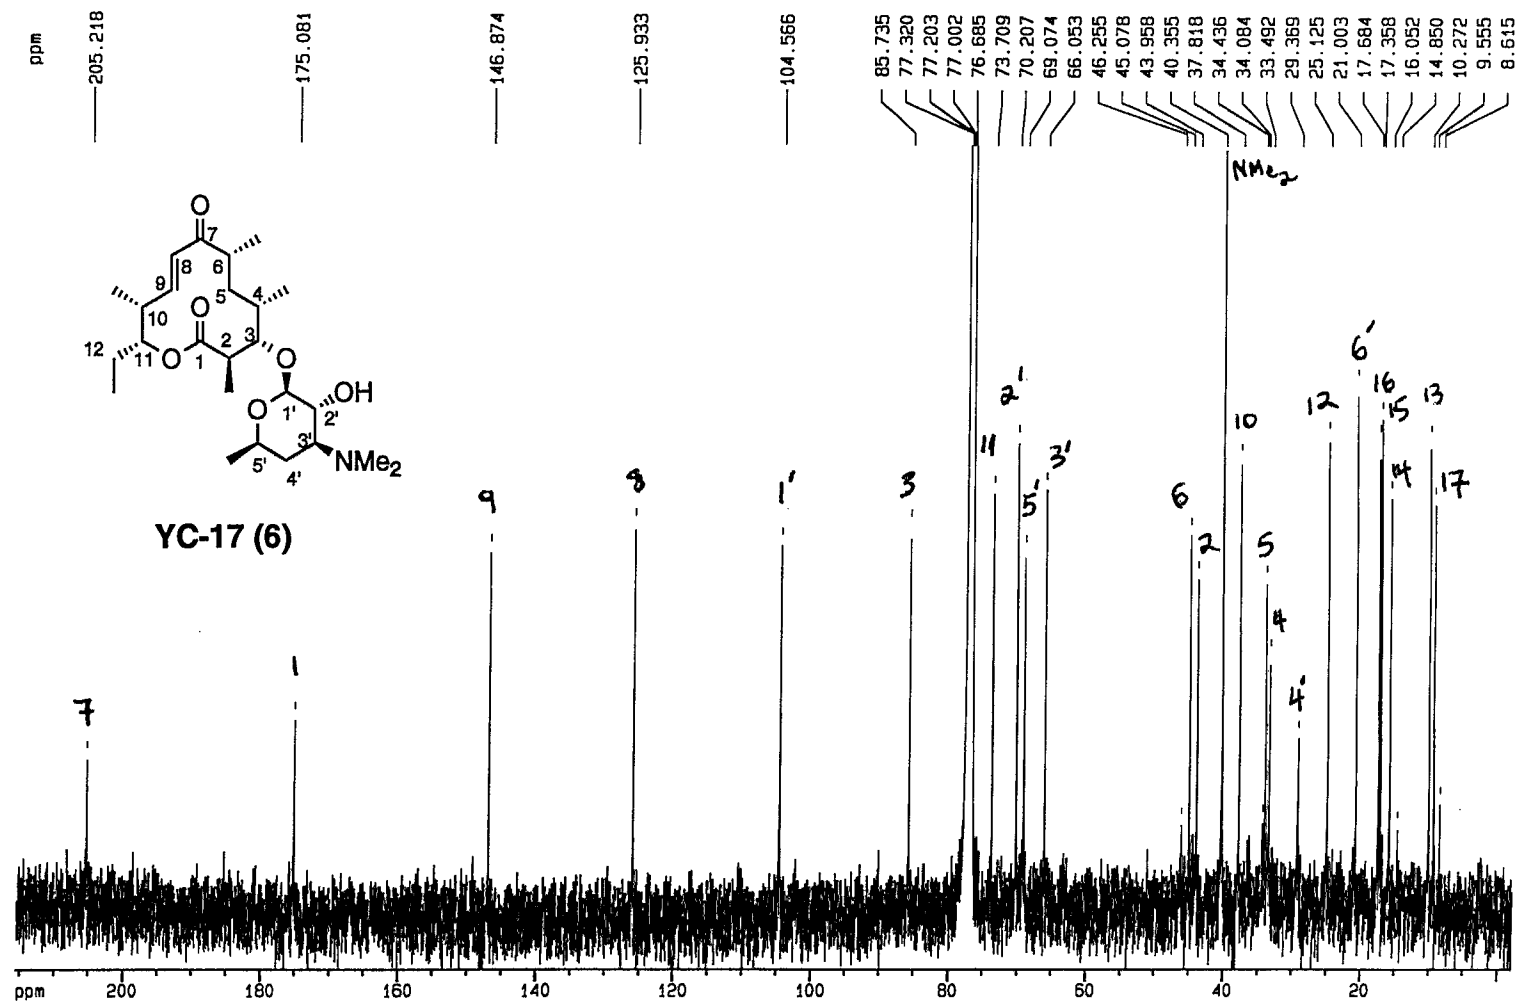

III. Low resolution FAB mass spectrum of YC-17 (6)

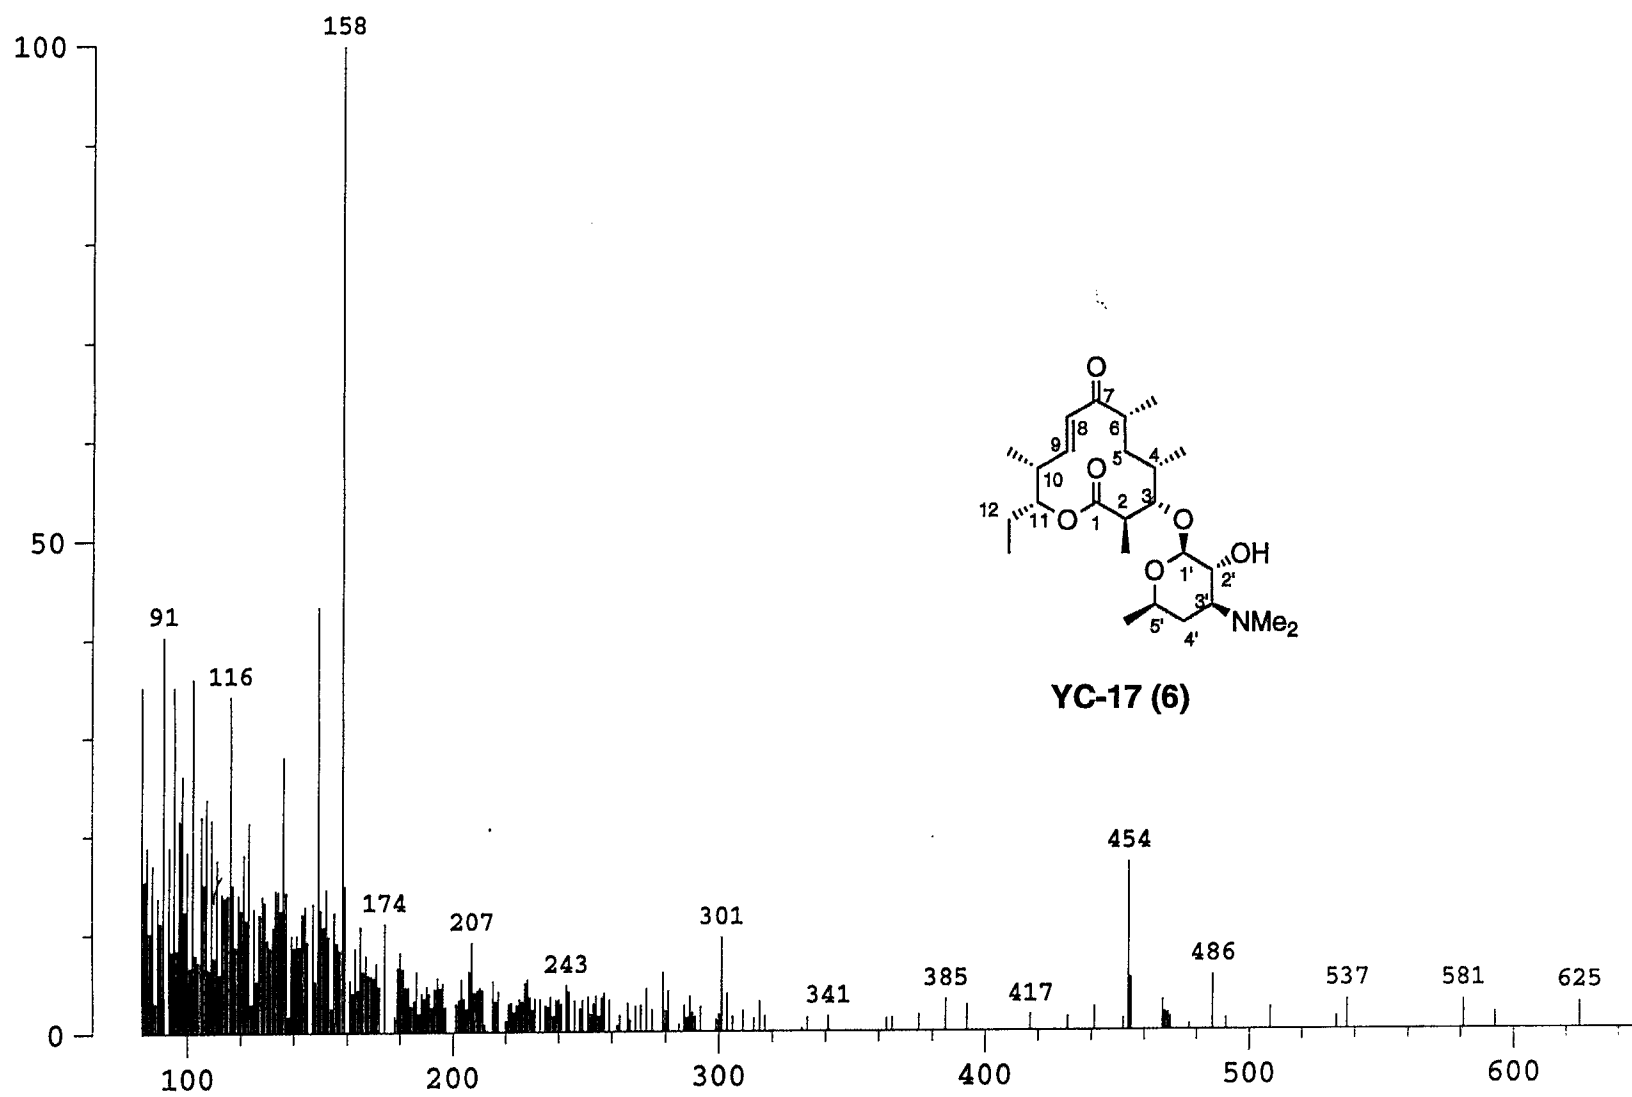

## IV. Experimental Section

All reactions were run under nitrogen atmosphere using oven-dried glassware and syringes (250 °C, overnight) when appropriate. Dichloromethane was distilled from CaH<sub>2</sub>. <sup>1</sup>H (250 MHz and 400 MHz) and <sup>13</sup>C (100 MHz) NMR spectra were recorded on Bruker WM-250 and Avance-400 spectrometers. All chemical shifts are reported in ppm, referenced to the residual CHCl<sub>3</sub> solvent peak (<sup>1</sup>H: 87.24; <sup>13</sup>C: 877.0). Mass spectra were obtained on a Kratos MS80RFA spectrometer with fast atom bombardment (FAB) ionization (matrix: nitrobenzyl alcohol/ NaI). Unless otherwise stated, all solvents were reagent grade and used without further purification.

**Preparation of YC-17 (6).** To a dry 50 mL round-bottomed flask containing 10-deoxymethynolide (**5**) (23.3 mg, 78.7 μmol) was added 1-fluoro-2-O-methoxycarbonyl-desosamine (**7**) (35 mg, 142 μmol, 1.8 eq.), bis(cyclopentadienyl)hafnium dichloride (150 mg, 393.5 μmol, 5 eq., Aldrich), 4 Å molecular sieves (50 mg, oven-dried, powdered, Fisher) and AgClO<sub>4</sub> (81.6 mg, 393.5 μmol, 5 eq., Aldrich). A dry nitrogen atmosphere was secured and the reaction flask was cooled to -30 °C in a dry-ice/acetone bath. Reaction was initiated by the addition of freshly distilled CH<sub>2</sub>Cl<sub>2</sub> (5 mL). The reaction was allowed to stir under nitrogen for 30 min. at -30 °C, at -10 °C for 30 min., and then at 0-5 °C for an additional hour. Finally, the reaction was allowed to equilibrate to room temperature and left to stir overnight. Upon completion, saturated NaHCO<sub>3</sub> (10 mL) was added and the resulting solution was filtered through Celite. The layers were separated, and the aqueous layer was extracted with CH<sub>2</sub>Cl<sub>2</sub> (2 x 5mL). All organic layers were combined, dried over Na<sub>2</sub>SO<sub>4</sub>, filtered, and reduced *in vacuo* to yield a yellow oil. The crude product was chromatographed on SiO<sub>2</sub> gel (230 -400 μ mesh, Aldrich) using 1% MeOH/CHCl<sub>3</sub> as the mobile phase to afford protected YC-17 (24.3 mg, 47.3 μmol, 60 % yield).

The 2'-O-methoxycarbonyl protected YC-17 thus prepared was deprotected by the addition of MeOH (5 mL), Et<sub>3</sub>N (1 mL), and H<sub>2</sub>O (1 mL). This mixture was stirred at 70 °C for 4 hours. Upon completion, the solvents were removed under high vacuum, and the crude reaction mixture was chromatographed on SiO<sub>2</sub> gel (230 -400 μ mesh, Aldrich) using 8.5% MeOH/CHCl<sub>3</sub> as the mobile phase to afford pure YC-17 **6** (15.5 mg, 33.0 μmol, 75 % yield). <sup>1</sup>H NMR, <sup>13</sup>C NMR, and FABMS spectral data were in agreement with literature values.

## V. Kinetic Data for methymycin production

**v vs. [S] methymycin production**

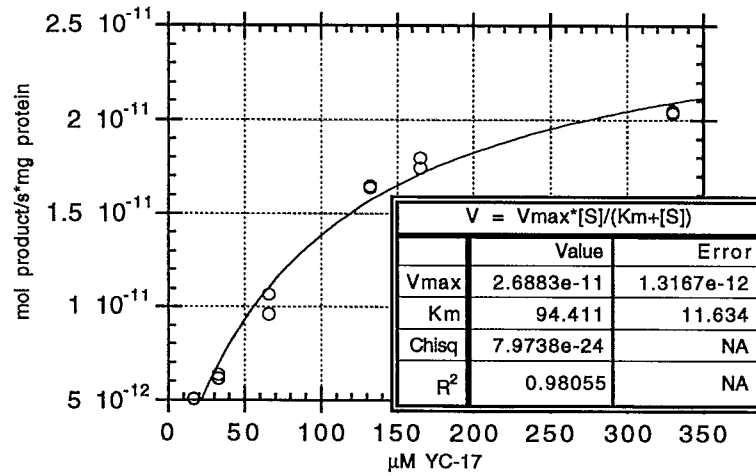

**[S]/v vs. [S] methymycin production**

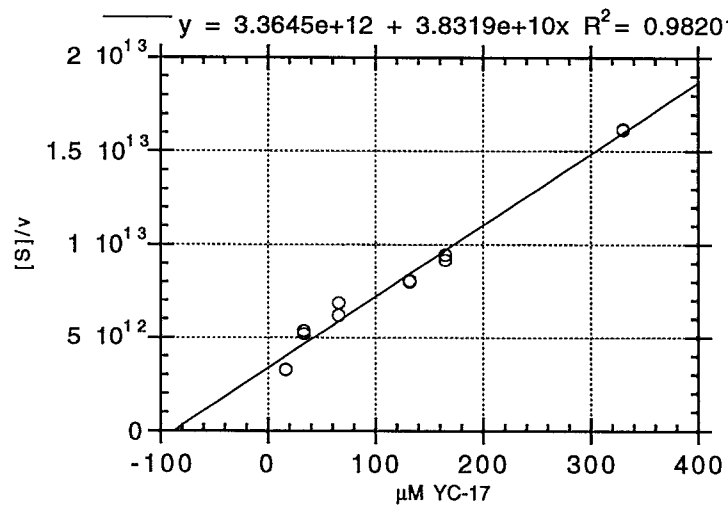

## VI. Kinetic Data for neomethymycin production

**v vs. [S] neomethymycin production**

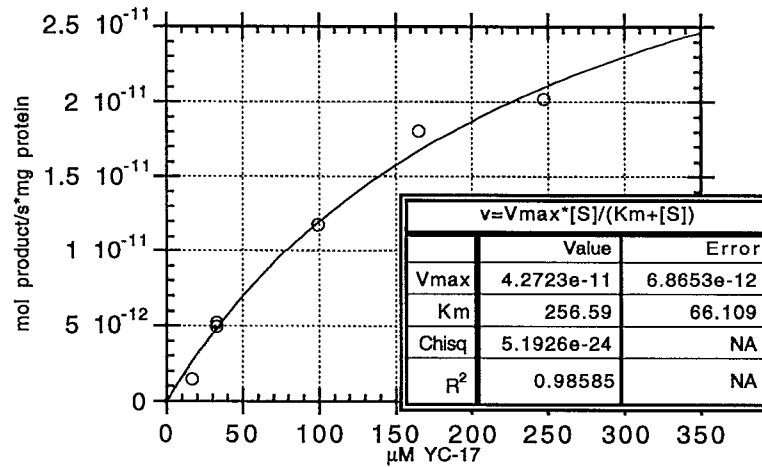

**[S]/v vs. [S] neometyhymycin production**

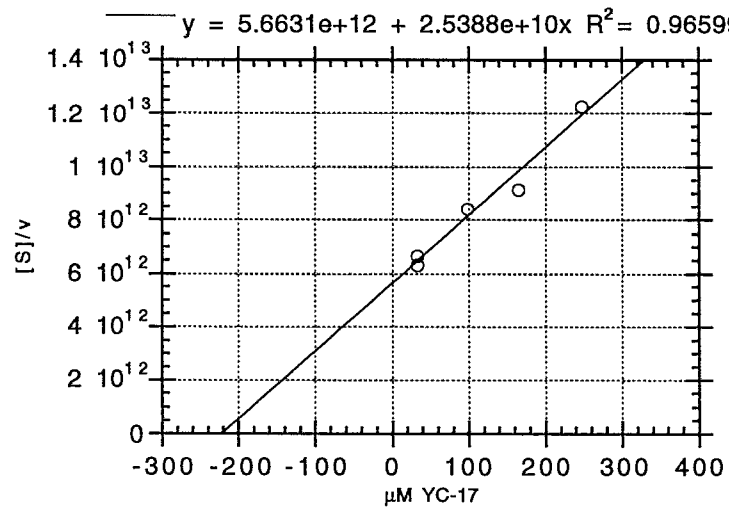

Supplement: Supplementary file 1 [file 5758611]
